# Supplementary material
Source: PubMed Central journal article supplement (PMC2563065)
Supplement: 0805696105_0805696105SI.pdf [file 0805696105_0805696105SI.pdf]

# Supporting Information

Rohmer *et al.* 10.1073/pnas.0805696105

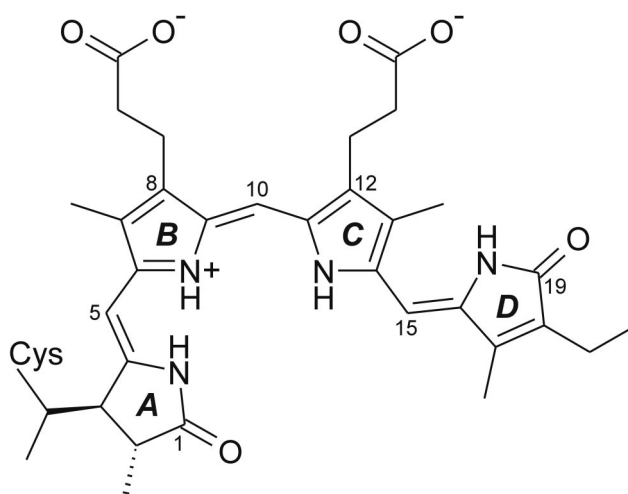

Fig. S1. Structural formula of protein-bound PCB shown in the ZZZssa geometry, as assumed for the Pr state.

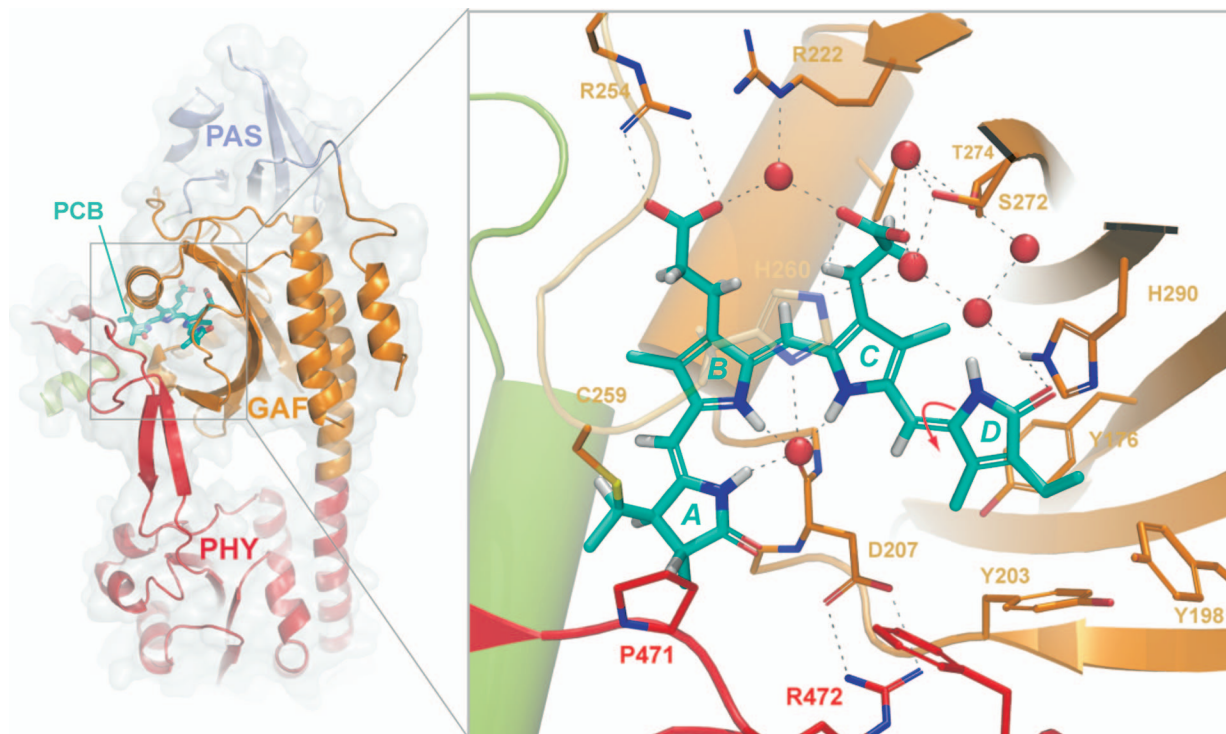

**Fig. S2.** Domain architecture (*Left*) and chromophore pocket (*Right*) in Cph1 $\Delta$ 2 (1). This figure was made by PyMol (2).

1. Essen LO, Maillet J, Hughes J (2008) The structure of a complete phytochrome sensory module in the Pr ground state. *Proc Natl Acad Sci USA* 105:14709–14714.
2. DeLano WL (2002). *The PyMOL Molecular Graphics System*. [www.pymol.org](http://www.pymol.org) (DeLano Scientific, San Carlos, CA).

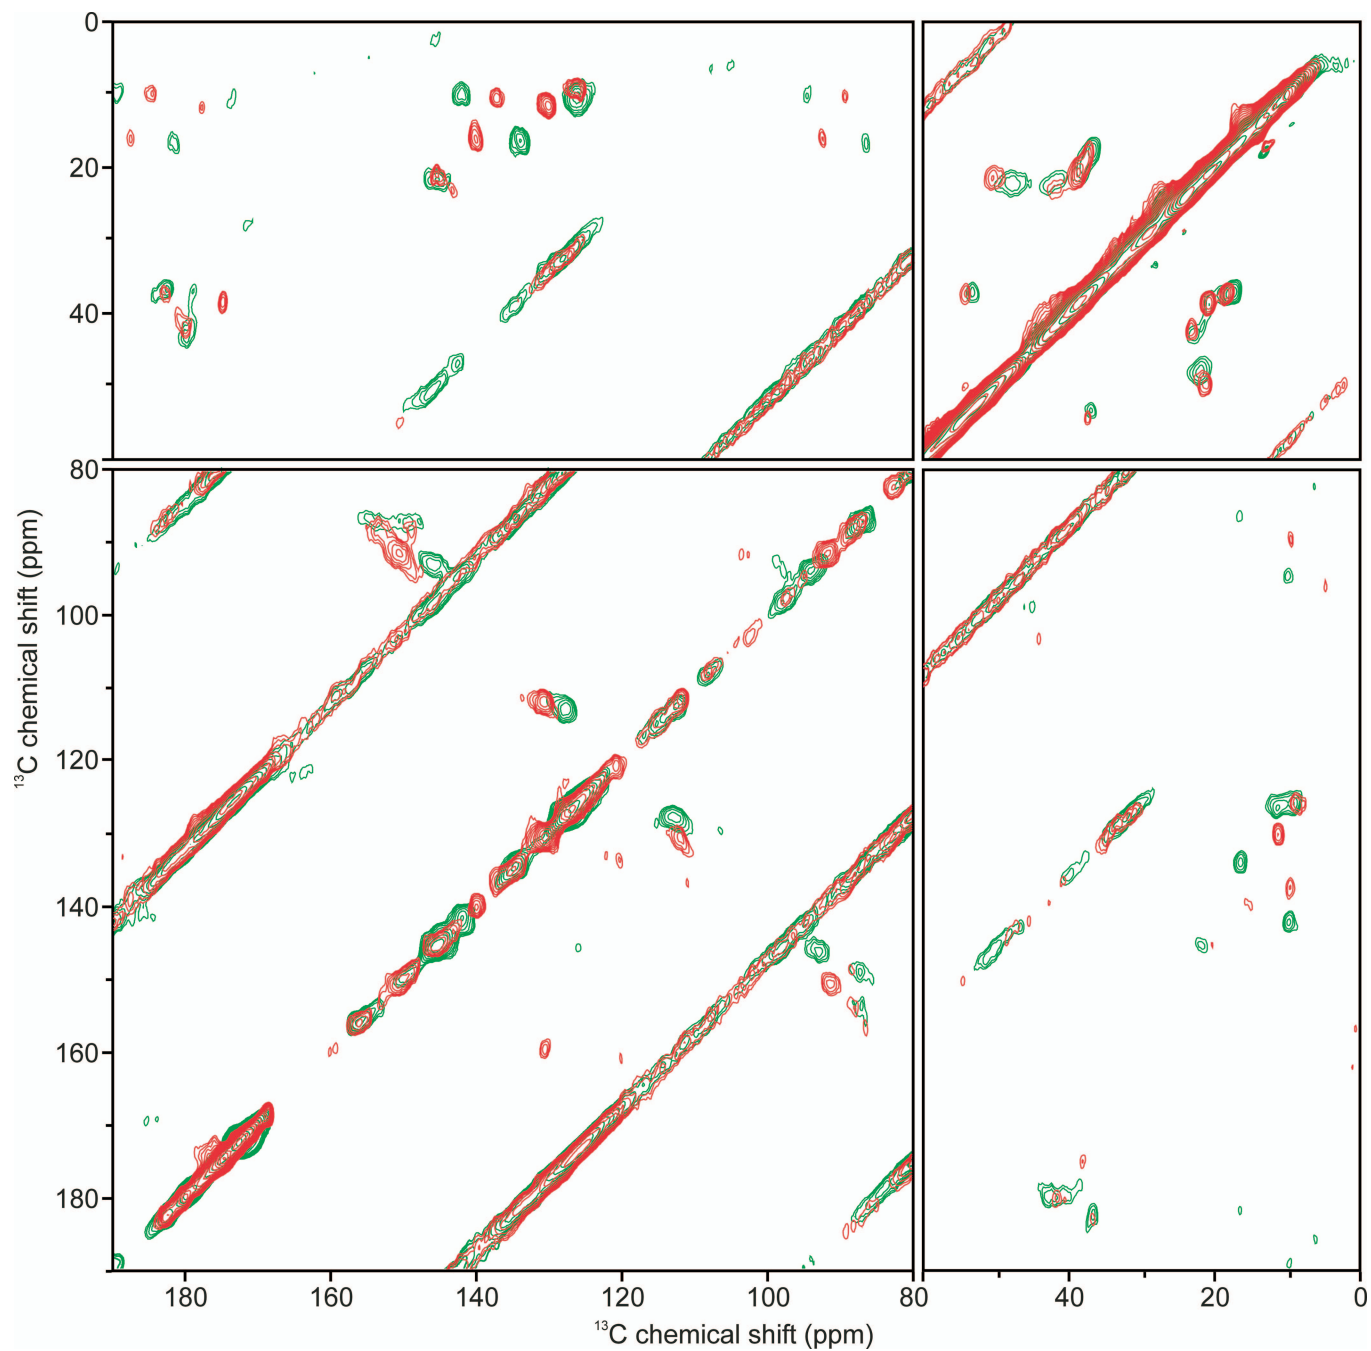

**Fig. S3.** Enlarged contour plot of the 2D  $^{13}\text{C}$ - $^{13}\text{C}$  DARR NMR spectra of  $u$ - $[^{13}\text{C}, ^{15}\text{N}]$ -PCB-Cph1 $\Delta$ 2 in the Pr (green) and Pfr states (red). The spectra were recorded with a proton mixing times of 5 ms at 233 K and a spinning frequency of 9 kHz.

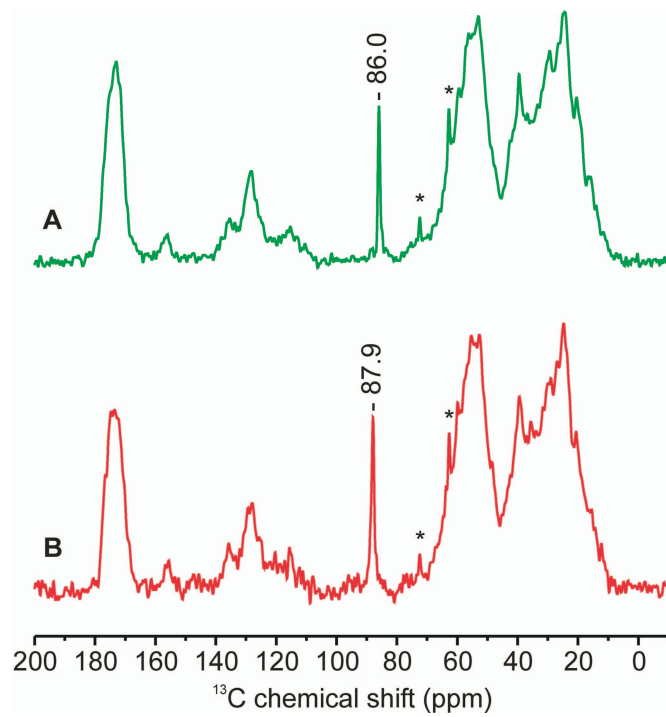

Fig. S4. The 1D  $^{13}\text{C}$  CP/MAS NMR spectra of  $^{13}\text{C}_5$ -PCB-*phyA65* in the Pr (A) and Pfr (B) states recorded at 9.4 T, 10 kHz and 243 K.

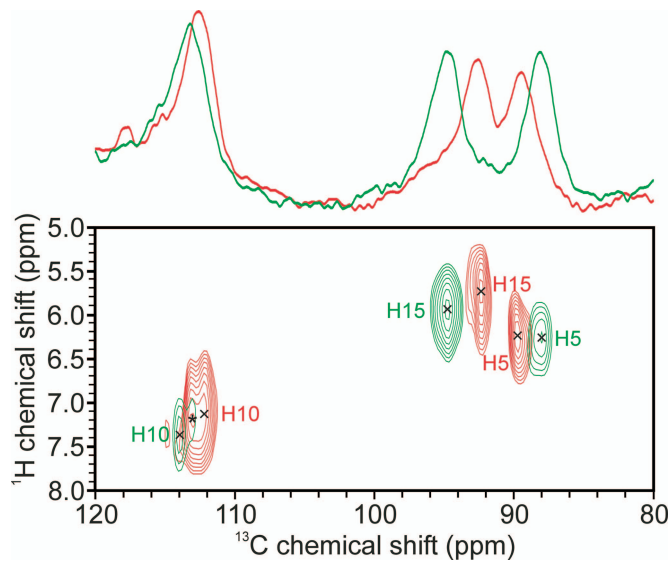

**Fig. S5.** Contour plot of 2D heteronuclear dipolar correlation spectra of the methine bridge region obtained from  $u\text{-}[^{13}\text{C}, ^{15}\text{N}]\text{-PCB-Cph1}\Delta 2$  in the Pr (green) and Pfr (red) states at a magnetic field of 9.4 T, 10 kHz and 243 K. The asterisks indicate the position of protein backbone signals in natural abundance.

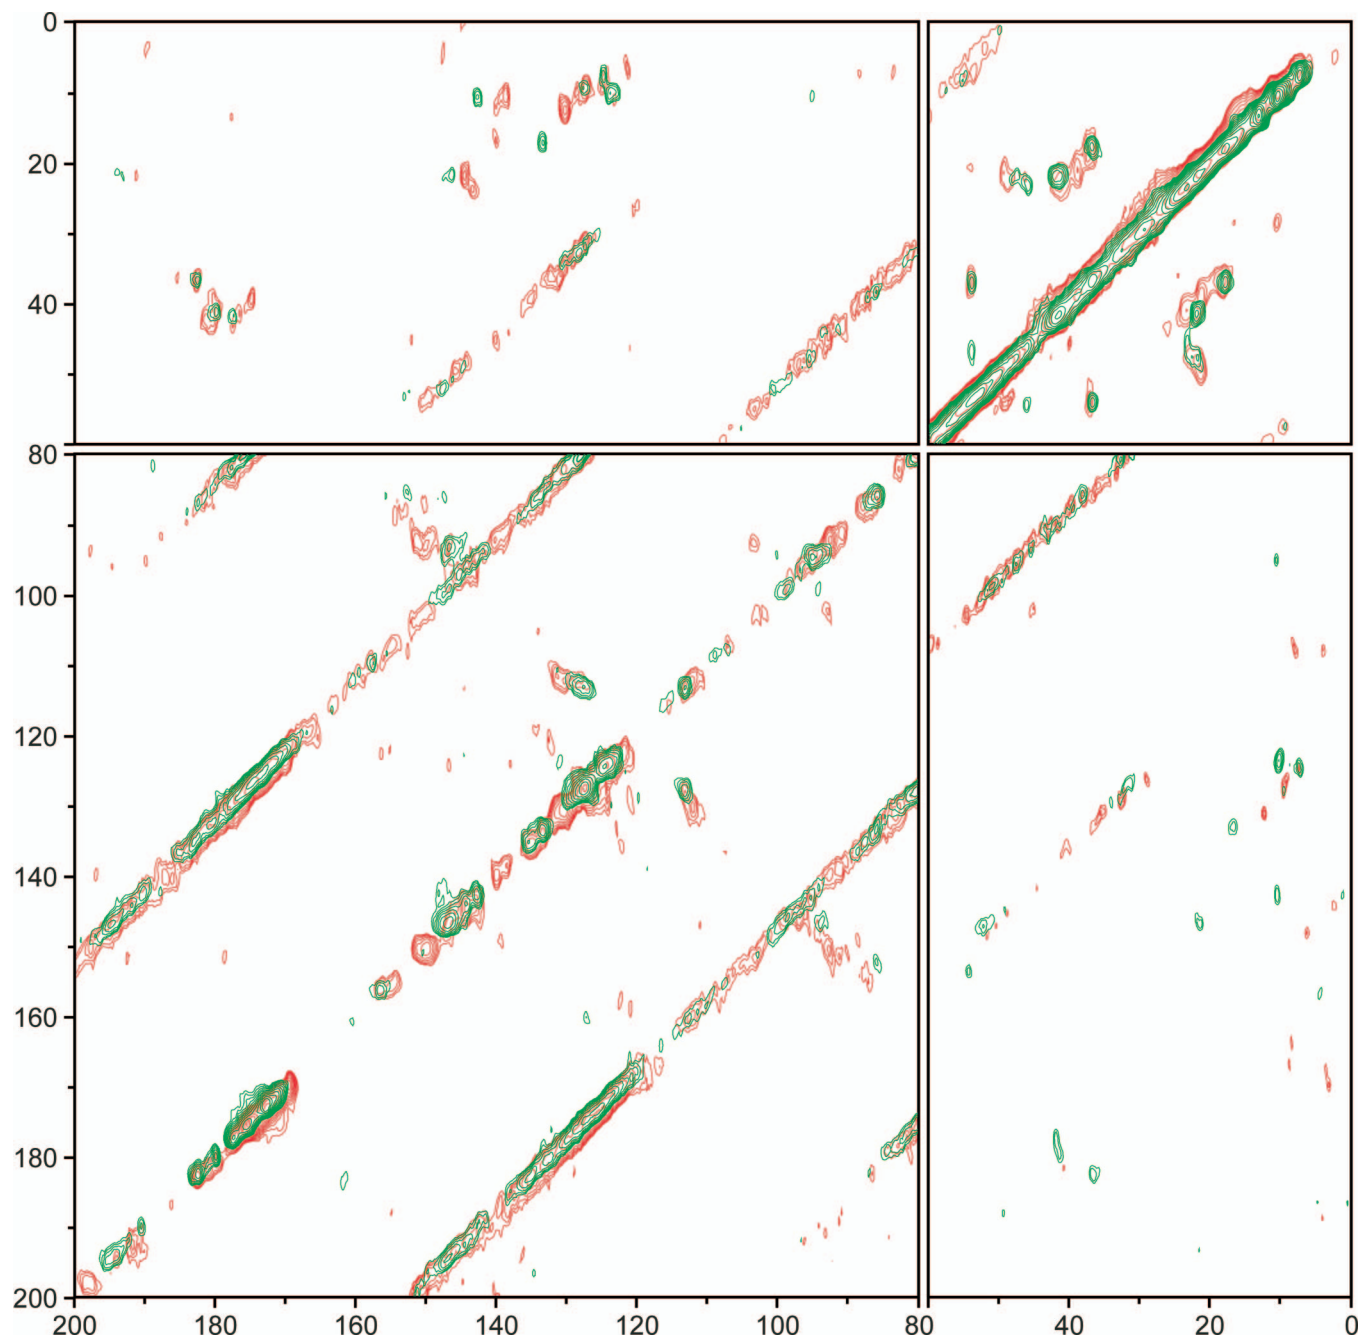

Fig. S6. Contour plot of the 2D  $^{13}\text{C}$ - $^{13}\text{C}$  DARR NMR spectra of  $u$ - $[^{13}\text{C}, ^{15}\text{N}]$ -PCB-*phyA65* in the Pr (green) and Pfr states (red). The spectra were recorded with proton mixing times of 5 ms at 233 K and a spinning frequency of 9 kHz.

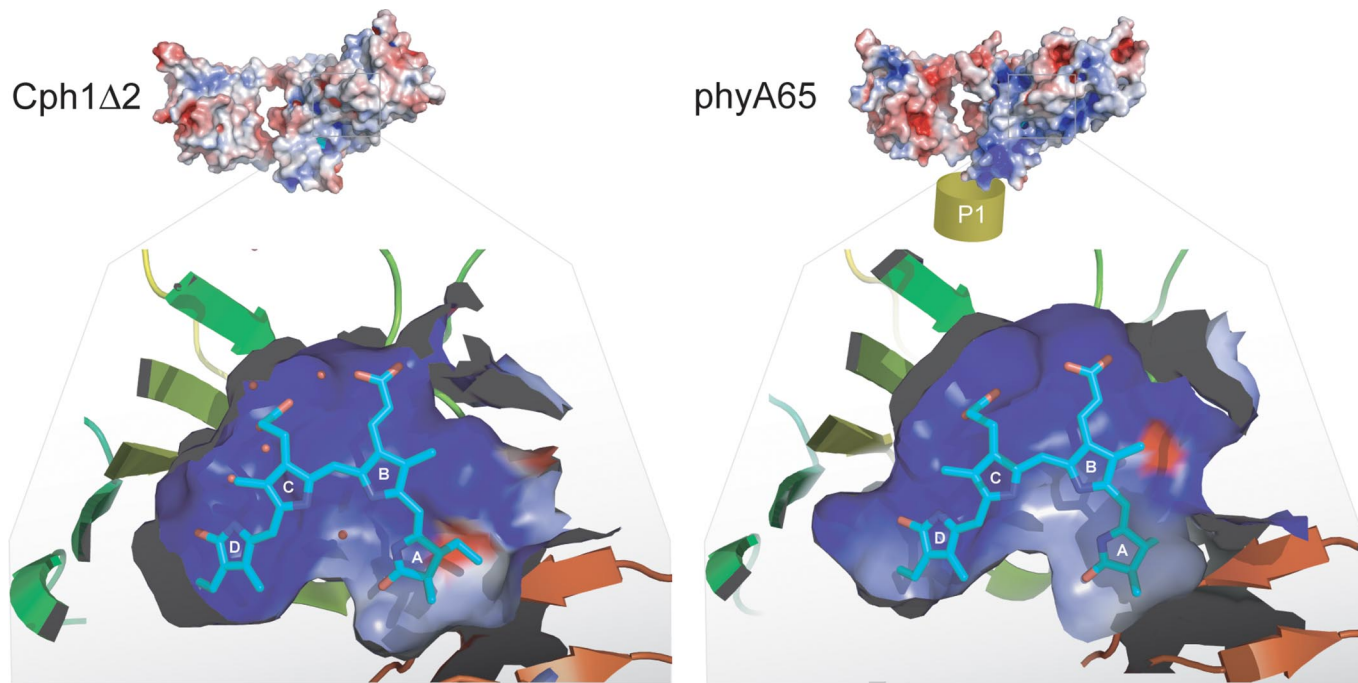

**Fig. S7.** Electrostatic surface properties of the photosensory modules Cph1 $\Delta$ 2 and *phyA65*. A homology model for *phyA65* was generated by MODELLER version 9 (1) using the cph1 $\Delta$ 2 structure as template. Electrostatic surface potentials were calculated with the apoproteins structures by APBS (2) using an ionic strength of 0.1 M and mapped onto the molecular surface (top) and the PCB-harboring cavity (below; blue: +5 kcal/e, white: 0 kcal/e, red: -5 kcal/e). Of 35 residues surrounding the PCB chromophore within a distance of 5 Å, 23 are identical in Cph1 $\Delta$ 2 and *phyA65*. The remaining 12 residues are either from the divergent N termini (Cph1 $\Delta$ 2  $\rightarrow$  *phyA65*: L15T, I20H), surface exposed (Y458D), conservatively exchanged (S206T, S255A, Y257H, L264M, T274V, L469M) or have slightly larger aliphatic side chains (A256P, A288V, A457P). The P1 subdomain of *phyA65* (light green) is a unique and structurally not yet characterized N-terminal extension of plant phytochromes. This figure was made by PyMol (3).

1. Eswar N, et al. (2006) Comparative protein structure modeling with MODELLER. *Curr Protocols Bioinformatics* Supplement 15:5.6.1–5.6.30.
2. Baker NA, Sept D, Joseph S, Holst MJ, McCammon JA (2001). Electrostatics of nanosystems: Application to microtubules and the ribosome. *Proc Natl Acad Sci USA* 98:10037–10041.
3. DeLano WL (2002). *The PyMOL Molecular Graphics System*. www.pymol.org (DeLano Scientific, San Carlos, CA).

Table S1. The  $^{13}\text{C}$  chemical shift assignments obtained in the present work

| Atom            | Cph1Δ2 |       |        | phyA65 |       |        |
|-----------------|--------|-------|--------|--------|-------|--------|
|                 | Pr     | Pfr   | Pr-Pfr | Pr     | Pfr   | Pr-Pfr |
| 1a              | 182.7  | 182.9 | -0.2   | 182.6  | 182.5 | + 0.1  |
| 1b              | 184.1  |       | + 1.2  |        |       |        |
| 2               | 37.1   | 37.3  | -0.2   | 36.8   | 37.0  | -0.2   |
| 2a              | 38.0   |       | + 0.7  |        |       |        |
| 2 <sup>1</sup>  | 17.4   | 18.2  | -0.8   | 17.7   | 17.7  | 0      |
| 3               | 53.3   | 54.3  | -1.0   | 53.9   | 53.9  | 0      |
| 3 <sup>1</sup>  | 47.5   | 49.7  | -2.2   | 47.6   | 49.1  | -1.5   |
| 3 <sup>1a</sup> |        |       |        | 45.8   |       | -3.3   |
| 3 <sup>2</sup>  | 22.0   | 21.2  | + 0.8  | 21.7   | 21.3  | + 0.4  |
| 3 <sup>2b</sup> |        |       |        | 23.0   |       | + 1.7  |
| 4               | 153.9  | 153.5 | + 0.4  |        |       |        |
| 5               | 87.1   | 88.5  | -1.4   | 85.8   | 87.1  | -1.3   |
| 6               | 149.5  | 149.3 | + 0.2  |        |       |        |
| 7               | 125.5  | 126.3 | -0.8   | 124.7  | 124.6 | + 0.1  |
| 7 <sup>1</sup>  | 9.3    | 9.2   | + 0.1  | 7.2    | 7.5   | -0.3   |
| 8               | 145.2  | 143.8 | + 1.4  | 146.4  | 143.4 | + 3.0  |
| 8 <sup>1a</sup> | 22.8   | 22.9  | -0.1   | 21.8   | 23.0  | -1.2   |
| 8 <sup>1b</sup> | 21.8   |       | -1.1   |        |       |        |
| 8 <sup>2a</sup> | 42.9   | 41.8  | + 1.1  | 41.5   | 41.1  | + 0.4  |
| 8 <sup>2b</sup> | 41.4   |       | -0.4   |        |       |        |
| 8 <sup>3a</sup> | 180.0  | 180.5 | -0.5   | 179.9  | 179.7 | + 0.2  |
| 8 <sup>3b</sup> | 179.3  |       | -1.2   |        |       |        |
| 9               | 127.7  | 130.9 | -3.2   | 127.7  | 130.6 | -2.9   |
| 10              | 112.8  | 112.4 | + 0.4  | 113.0  | 111.9 | + 1.1  |
| 11              | 127.7  | 130.9 | -3.2   | 127.7  | 130.6 | -2.9   |
| 12              | 145.2  | 145.8 | -0.6   | 146.4  | 144.5 | + 1.9  |
| 12 <sup>1</sup> | 20.4   | 20.5  | -0.1   | 21.8   | 21.0  | + 0.8  |
| 12 <sup>2</sup> | 38.1   | 38.4  | -0.3   | 41.5   | 39.0  | + 2.5  |
| 12 <sup>3</sup> | 179.0  | 175.3 | + 3.7  | 177.5  | 174.7 | + 2.8  |
| 13              | 126.4  | 130.7 | -4.3   | 123.7  | 130.1 | -6.4   |
| 13 <sup>1</sup> | 11.4   | 11.6  | -0.2   | 10.0   | 12.1  | -2.1   |
| 14              | 145.9  | 152.0 | -6.1   | 146.6  | 150.5 | -3.9   |
| 15              | 93.2   | 91.6  | + 1.6  | 93.3   | 92.3  | + 1.0  |
| 16              | 145.9  | 151.6 | -6.7   | 146.6  | 150.5 | -3.9   |
| 17              | 142.1  | 137.5 | + 4.6  | 142.6  | 138.6 | + 4.0  |
| 17 <sup>1</sup> | 9.9    | 10.0  | -0.1   | 10.3   | 10.3  | 0      |
| 18              | 134.1  | 140.5 | -6.4   | 133.3  | 140.1 | -6.8   |
| 18 <sup>1</sup> | 16.5   | 15.7  | + 0.8  | 16.6   |       |        |
| 18 <sup>2</sup> | 13.2   | 13.3  | -0.1   |        |       |        |
| 19              | 172.7  | 169.1 | + 3.6  | 172.4  | 169.6 | + 2.8  |



Table S2. The  $^1\text{H}$  and  $^{15}\text{N}$  chemical shift assignments obtained in the present work

| Pr                           |          |                              | Pfr                          |          |                              |
|------------------------------|----------|------------------------------|------------------------------|----------|------------------------------|
| $\delta_{\text{N}}$<br>(ppm) | Atom     | $\delta_{\text{H}}$<br>(ppm) | $\delta_{\text{N}}$<br>(ppm) | Atom     | $\delta_{\text{H}}$<br>(ppm) |
| 160.5 }<br>158.1 }           | N22, N23 | 10.9, 11.7                   | 158.6 }<br>155.8 }           | N22, N23 | 11.7, 11.7                   |
| 147.0                        | N21      | 10.9                         | 142.6                        | N21      | 10.6                         |
| 131.9                        | N24      | 9.9                          | 138.0                        | N24      | 9.6                          |
